# Supplementary material for: Synthesis and Characterization of Iron Bispyridine Bisdicyanamide, Fe[C<sub>5</sub>H<sub>5</sub>N]<sub>2</sub>[N(CN)<sub>2</sub>]<sub>2</sub>
Source: Preprints.org preprint supplement (doi:10.20944/preprints202305.1978.v1), 2023-05-29

---

The following ALERTS were generated. Each ALERT has the format

**test-name\_ALERT\_alert-type\_alert-level.**

Click on the hyperlinks for more details of the test.

---

### Alert level B

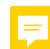

RINTA01\_ALERT\_3\_B The value of Rint is greater than 0.18

Rint given 0.197

PLAT020\_ALERT\_3\_B The Value of Rint is Greater Than 0.12 ..... 0.197 Report

PLAT149\_ALERT\_3\_B s.u. on the beta Angle is Too Large ..... 0.06 Degree

---

### Alert level C

PLAT213\_ALERT\_2\_C Atom C2 has ADP max/min Ratio ..... 3.3 prolat

PLAT220\_ALERT\_2\_C NonSolvent Resd 1 C Ueq(max)/Ueq(min) Range 3.9 Ratio

PLAT241\_ALERT\_2\_C High 'MainMol' Ueq as Compared to Neighbors of C1 Check

PLAT241\_ALERT\_2\_C High 'MainMol' Ueq as Compared to Neighbors of C2 Check

PLAT242\_ALERT\_2\_C Low 'MainMol' Ueq as Compared to Neighbors of N1 Check

PLAT250\_ALERT\_2\_C Large U3/U1 Ratio for Average U(i,j) Tensor .... 2.7 Note

PLAT341\_ALERT\_3\_C Low Bond Precision on C-C Bonds ..... 0.007 Ang.

PLAT905\_ALERT\_3\_C Negative K value in the Analysis of Variance ... -0.985 Report

---

### Alert level G

PLAT004\_ALERT\_5\_G Polymeric Structure Found with Maximum Dimension 1 Info

PLAT013\_ALERT\_1\_G N.O.K. \_shelx\_hkl\_checksum Found in CIF ..... Please Check

PLAT794\_ALERT\_5\_G Tentative Bond Valency for Fe1 (II) 2.01 Info

PLAT802\_ALERT\_4\_G CIF Input Record(s) with more than 80 Characters 2 Info

PLAT883\_ALERT\_1\_G No Info/Value for \_atom\_sites\_solution\_primary . Please Do !

PLAT912\_ALERT\_4\_G Missing # of FCF Reflections Above STh/L= 0.600 28 Note

PLAT978\_ALERT\_2\_G Number C-C Bonds with Positive Residual Density. 1 Info

---

- 0 **ALERT level A** = Most likely a serious problem - resolve or explain  
3 **ALERT level B** = A potentially serious problem, consider carefully  
8 **ALERT level C** = Check. Ensure it is not caused by an omission or oversight  
7 **ALERT level G** = General information/check it is not something unexpected

- 2 ALERT type 1 CIF construction/syntax error, inconsistent or missing data  
7 ALERT type 2 Indicator that the structure model may be wrong or deficient  
5 ALERT type 3 Indicator that the structure quality may be low  
2 ALERT type 4 Improvement, methodology, query or suggestion  
2 ALERT type 5 Informative message, check
- 

## Validation response form

Please find below a validation response form (VRF) that can be filled in and pasted into your CIF.

```
# start Validation Reply Form
_vrf_RINTA01_shelx
;
PROBLEM: The value of Rint is greater than 0.18
RESPONSE: ...
;
```

```

_vrf_PLAT020_shelx
;
PROBLEM: The Value of Rint is Greater Than 0.12 ..... 0.197 Report
RESPONSE: ...
;
_vrf_PLAT149_shelx
;
PROBLEM: s.u. on the beta Angle is Too Large ..... 0.06 Degree
RESPONSE: ...
;
_vrf_PLAT213_shelx
;
PROBLEM: Atom C2 has ADP max/min Ratio ..... 3.3 prolat
RESPONSE: ...
;
_vrf_PLAT220_shelx
;
PROBLEM: NonSolvent Resd 1 C Ueq(max)/Ueq(min) Range 3.9 Ratio
RESPONSE: ...
;
_vrf_PLAT241_shelx
;
PROBLEM: High 'MainMol' Ueq as Compared to Neighbors of C1 Check
RESPONSE: ...
;
_vrf_PLAT242_shelx
;
PROBLEM: Low 'MainMol' Ueq as Compared to Neighbors of N1 Check
RESPONSE: ...
;
_vrf_PLAT250_shelx
;
PROBLEM: Large U3/U1 Ratio for Average U(i,j) Tensor .... 2.7 Note
RESPONSE: ...
;
_vrf_PLAT341_shelx
;
PROBLEM: Low Bond Precision on C-C Bonds ..... 0.007 Ang.
RESPONSE: ...
;
_vrf_PLAT905_shelx
;
PROBLEM: Negative K value in the Analysis of Variance ... -0.985 Report
RESPONSE: ...
;
# end Validation Reply Form

```

---

It is advisable to attempt to resolve as many as possible of the alerts in all categories. Often the minor alerts point to easily fixed oversights, errors and omissions in your CIF or refinement strategy, so attention to these fine details can be worthwhile. In order to resolve some of the more serious problems it may be necessary to carry out additional measurements or structure refinements. However, the purpose of your study may justify the reported deviations and the more serious of these should normally be commented upon in the discussion or experimental section of a paper or in the "special\_details" fields of the CIF. checkCIF was carefully designed to identify outliers and unusual parameters, but every test has its limitations and alerts that are not important in a particular case may appear. Conversely, the absence of alerts does not guarantee there are no aspects of the results needing attention. It is up to the individual to critically assess their own results and, if necessary, seek expert advice.

### **Publication of your CIF in IUCr journals**

A basic structural check has been run on your CIF. These basic checks will be run on all CIFs submitted for publication in IUCr journals (*Acta Crystallographica*, *Journal of Applied Crystallography*, *Journal of Synchrotron Radiation*); however, if you intend to submit to *Acta Crystallographica Section C* or *E* or *IUCrData*, you should make sure that full publication checks are run on the final version of your CIF prior to submission.

### **Publication of your CIF in other journals**

Please refer to the *Notes for Authors* of the relevant journal for any special instructions relating to CIF submission.

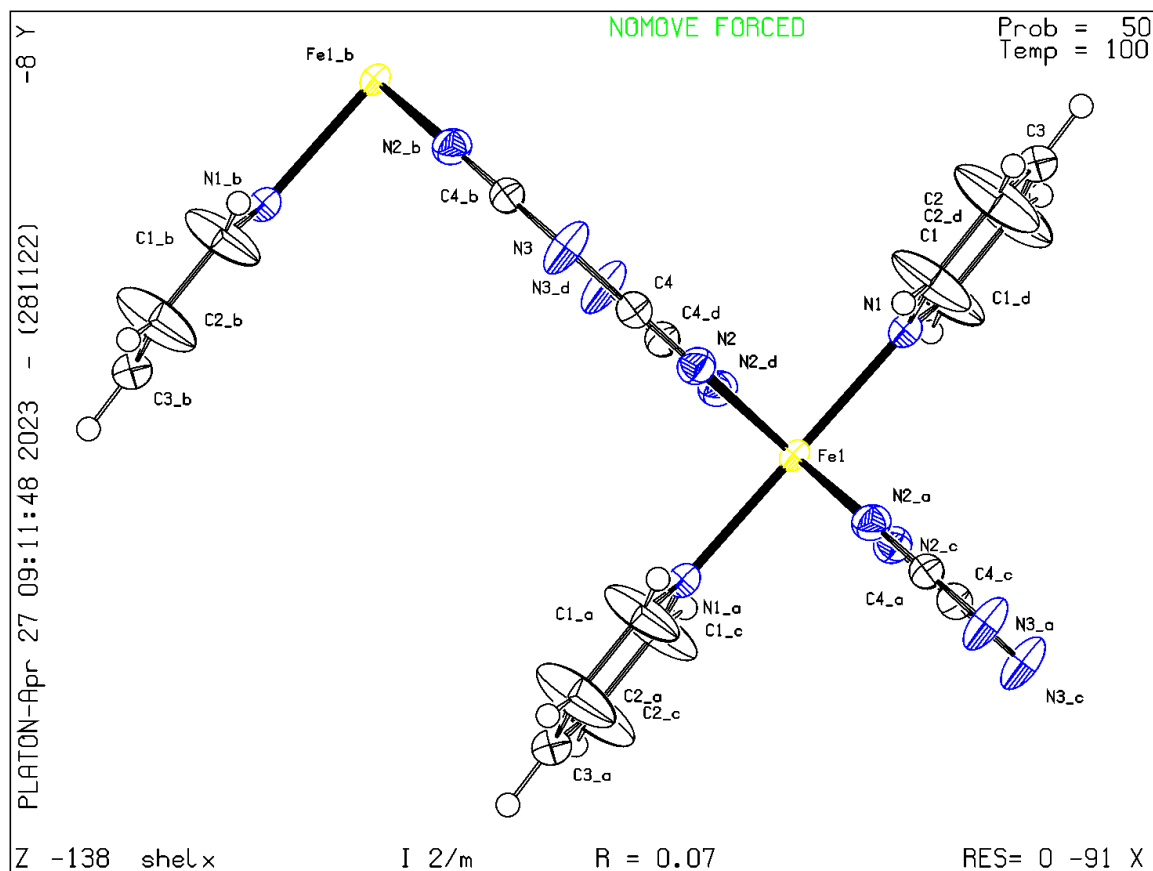

Supplement: Supplementary file 1 [file supplementary]
